# Supplementary material for: Polysaccharide-derived hydrogel water filter for the rapid and selective removal of arsenic
Source: Royal Society of Chemistry journal article supplement (doi:10.1039/c9ew00247b), 2019-01-01
Supplement: c9ew00247b1.pdf [file c9ew00247b1.pdf]

## **Polysaccharide-derived hydrogel water filter for the rapid and selective removal of arsenic**

Santu Maity,<sup>a</sup> Nabanita Naskar,<sup>bc</sup> Susanta Lahiri\*<sup>b</sup> and Jhuma Ganguly\*<sup>a</sup>

<sup>a</sup>Department of Chemistry, Indian Institute of Engineering Science and Technology, Howrah-711103, India

<sup>b</sup>Chemical Sciences Division, Saha Institute of Nuclear Physics, 1/AF Bidhannagar, Kolkata-700064, India.

<sup>c</sup>Department of Environmental Science, University of Calcutta, 35, Ballygunge Circular Road, Kolkata-700019, India.

**Table S1.** List of some chitosan based hydrogel materials for the removal of toxic pollutants.

| Hydrogel (Adsorbent)                                                                                               | Adsorbate                                                | Reference |
|--------------------------------------------------------------------------------------------------------------------|----------------------------------------------------------|-----------|
| Magnetic chitosan- 2-aminopyridine glyoxal Schiff's base resin (CSAP)                                              | Cu(II), Cd(II) and Ni(II)                                | 1         |
| Gelatin–chitosan (GC) hydrogel                                                                                     | Pb(II), Hg(II), Cd(II) and Cr(III)                       | 2         |
| Graphene oxide–chitosan (GO–CS)                                                                                    | Methylene blue, Eosin Y, Cu(II) and Pb(II)               | 3         |
| Composite chitosan biosorbent (CCB)                                                                                | As(III) and As(V)                                        | 4         |
| Magnetic cellulose–chitosan                                                                                        | Cu <sup>2+</sup> , Fe <sup>2+</sup> and Pb <sup>2+</sup> | 5         |
| CM-cellulose/chitosan blend hydrogels                                                                              | Cu(II), Cd(II) and Zn(II)                                | 6         |
| Chitosan based 3D hydrogel framework (ChF)                                                                         | <sup>152</sup> Eu and <sup>137</sup> Cs                  | 7         |
| Chitosan-based hydrogel, graft-copolymerized with methylenebisacrylamide and poly(acrylic acid) (CS-co-MMB-co-PAA) | Pb(II), Cd(II), and Cu(II)                               | 8         |
| chitosan: red scoria (Ch–Rs) and chitosan: pumice (Ch–Pu)                                                          | As(V)                                                    | 9         |
| EDTA Functionalized Chitosan/Polyacrylamide Double Network Hydrogel                                                | Cd(II), Cu(II) and Pb(II)                                | 10        |

**Table S2.** Detailed operating conditions of ICP-OES and analytical characteristics of heavy metals measured by the instrument

| Instrumental condition                | Element | Wavelength (nm) |
|---------------------------------------|---------|-----------------|
| RF power: 1350 W<br>Pump rate: 50 rpm | As      | 197.2           |
|                                       | Cd      | 226.5           |
|                                       |         | 228.8           |

|                                  |    |       |
|----------------------------------|----|-------|
| 1 L/min                          | Cr | 267.7 |
| Nebulizer gas<br>flow: 0.6 L/min |    | 283.5 |
| Coolant gas flow:<br>12 L/min    | Ni | 221.6 |
|                                  | Pb | 341.4 |
|                                  |    | 216.9 |

**Table S3.** Details of groundwater sampling location

| Sample name | Sampling location                                                                       | Coordinates              | Depth (ft) |
|-------------|-----------------------------------------------------------------------------------------|--------------------------|------------|
| GWS1        | Ward no. 10, Ashokenagar Kalyangarh Municipality, North 24 Parganas, West Bengal, India | 22°50'51"N<br>88°37'28"W | 40         |
| GWS2        | Ward no. 11, Ashokenagar Kalyangarh Municipality, North 24 Parganas, West Bengal, India | 22°51'1"N<br>88°37'28"W  | 60         |

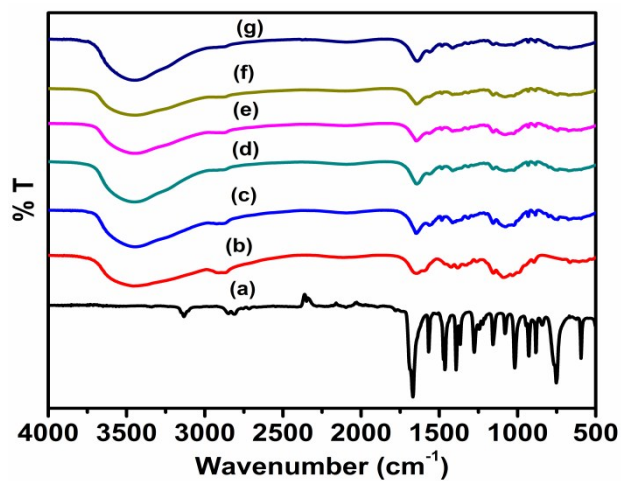

**Fig. S1** FT-IR spectra of (a) furfuraldehyde, (b) chitosan, (c) FCH0.9, (d) FCH1.2, (e) FCH1.5, (f) FCH2.0 and (g) FCH2.5.

**Table S4.** Chemical shifts of FCH by solid state  $^{13}\text{C}$  CP-MAS NMR

| C <sub>1</sub> | C <sub>2</sub> | C <sub>3</sub> | C <sub>4</sub> | C <sub>5</sub> | C <sub>6</sub> | C <sub>7</sub> | C <sub>1a</sub> | C <sub>2a</sub> | C <sub>3a</sub> | C <sub>4a</sub> |
|----------------|----------------|----------------|----------------|----------------|----------------|----------------|-----------------|-----------------|-----------------|-----------------|
| 104.2          | 75.8           | 83.8           | 92.7           | 60.6           | 57.2           | 156.4          | 147.4           | 120.7           | 111.8           | 143.3           |

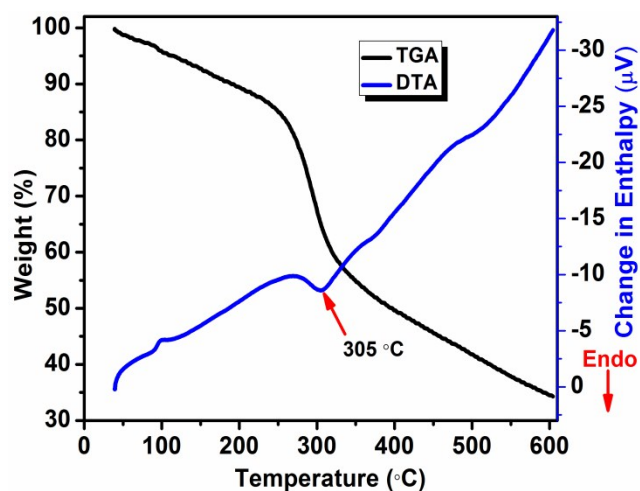

**Fig. S2** Thermogravimetric analysis of FCH.

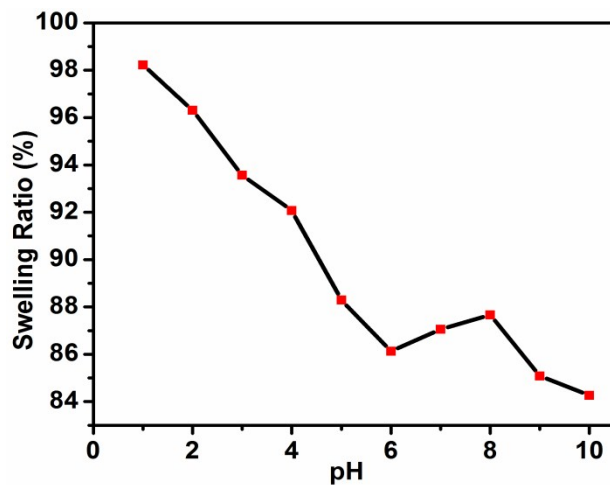

**Fig. S3** pH dependent swelling study of FCH.

**Table S5:** The detail analysis of groundwater sample

| Sample name | Name of metal ions | Conc. of metals before adsorption (ppb) | Conc. of metals after adsorption (ppb) | Removal efficiency (%) |
|-------------|--------------------|-----------------------------------------|----------------------------------------|------------------------|
| GWS1        | As(V)              | 15                                      | 0<br>(pH=3)                            | 100                    |
|             |                    |                                         | 0<br>(Groundwater pH)                  | 100                    |
|             | Cd(II)             | 0                                       | 0                                      | 0                      |
|             | Cr(III)            | 9                                       | 8<br>(pH=3)                            | 11                     |
|             |                    |                                         | 6<br>(Groundwater pH)                  | 22                     |
|             | Ni(II)             | 0                                       | 0                                      | 0                      |
|             | Pb(II)             | 25                                      | 20<br>(pH=3)                           | 20                     |
|             |                    |                                         | 20<br>(Groundwater pH)                 | 20                     |
| As(V)       | 21                 | 0<br>(pH=3)                             | 100                                    |                        |
|             |                    | 0                                       | 100                                    |                        |

|      |         |    |                        |    |
|------|---------|----|------------------------|----|
| GWS2 |         |    | (Groundwater pH)       |    |
|      | Cd(II)  | 3  | 2<br>(pH=3)            | 33 |
|      |         |    | 3                      | 0  |
|      | Cr(III) | 6  | 5<br>(pH=3)            | 17 |
|      |         |    | 5<br>(Groundwater pH)  | 17 |
|      | Ni(II)  | 12 | 11<br>(pH=3)           | 8  |
|      |         |    | 11<br>(Groundwater pH) | 8  |
|      | Pb(II)  | 22 | 19<br>(pH=3)           | 14 |
|      |         |    | 18<br>(Groundwater pH) | 18 |

## Reference

1. M. Monier, D. M. Ayad and D. A. Abdel-Latif, Adsorption of Cu(II), Cd(II) and Ni(II) ions by cross-linked magnetic chitosan-2-aminopyridine glyoxal Schiff's base, *Colloids Surf. B: Biointerfaces*, 2012, **94**, 250–258.

2. S. Lone, D. H. Yoon, H. Lee and I. W. Cheong, Gelatin–chitosan hydrogel particles for efficient removal of Hg(II) from wastewater, *Environ. Sci.: Water Res. Technol.*, 2019, **5**, 83–90.
3. Y. Chen, L. Chen, H. Bai and L. Li, Graphene oxide/chitosan composite hydrogels as broad-spectrum adsorbents for water purification, *J. Mater. Chem. A*, 2013, **1**, 1992–2001.
4. V. M. Boddu, K. Abburi, J. L. Talbott, E. D. Smith and R. Haasch, Removal of arsenic (III) and arsenic (V) from aqueous medium using chitosan-coated biosorbent, *Water Res.*, 2008, **42**, 633 – 642.
5. Z. Liu, H. Wang, C. Liu, Y. Jiang, G. Yu, X. Mu and X. Wang, Magnetic cellulose–chitosan hydrogels prepared from ionic liquids as reusable adsorbent for removal of heavy metal ions, *Chem. Commun.*, 2012, **48**, 7350–7352.
6. L. Zhao and H. Mitomo, Adsorption of Heavy Metal Ions from Aqueous Solution Onto Chitosan Entrapped CM-Cellulose Hydrogels Synthesized by Irradiation, *J. Appl. Polym. Sci.*, 2008, **110**, 1388–1395.
7. S. Maity, A. Datta, S. Lahiri and J. Ganguly, A dynamic chitosan-based self-healing hydrogel with tunable morphology and its application as an isolating agent, *RSC Adv.*, 2016, **6**, 81060–81068.
8. A. T. Paulino, L. A. Belfiore, L. T. Kubota, E. C. Muniz, V. C. Almeida, E. B. Tambourgi, Effect of magnetite on the adsorption behavior of Pb(II), Cd(II), and Cu(II) in chitosan-based hydrogels, *Desalination*, 2011, **275**, 187–196.
9. T. G. Asere, S. Mincke, J. D. Clercq, K. Verbeken, D. A. Tessema, F. Fufa, C. V. Stevens and G. D. Laing, Removal of Arsenic (V) from Aqueous Solutions Using Chitosan–Red Scoria and Chitosan–Pumice Blends, *Int. J. Environ. Res. Public Health*, 2017, **14**, 895; doi:10.3390/ijerph14080895.
10. J. Ma, G. Zhou, L. Chu, Y. Liu, C. Liu, S. Luo and Y. Wei, Efficient Removal of Heavy Metal Ions with An EDTA Functionalized Chitosan/Polyacrylamide Double Network Hydrogel, *ACS Sustainable Chem. Eng.*, 2017, **5**, 843–851.
